# Supplementary material for: Metagenomic insight into taxonomic composition, environmental filtering and functional redundancy for shaping worldwide modern non-lithifying microbial mats
Source: PeerJ journal article supplement (doi:10.7717/peerj.17412), 2024-05-30

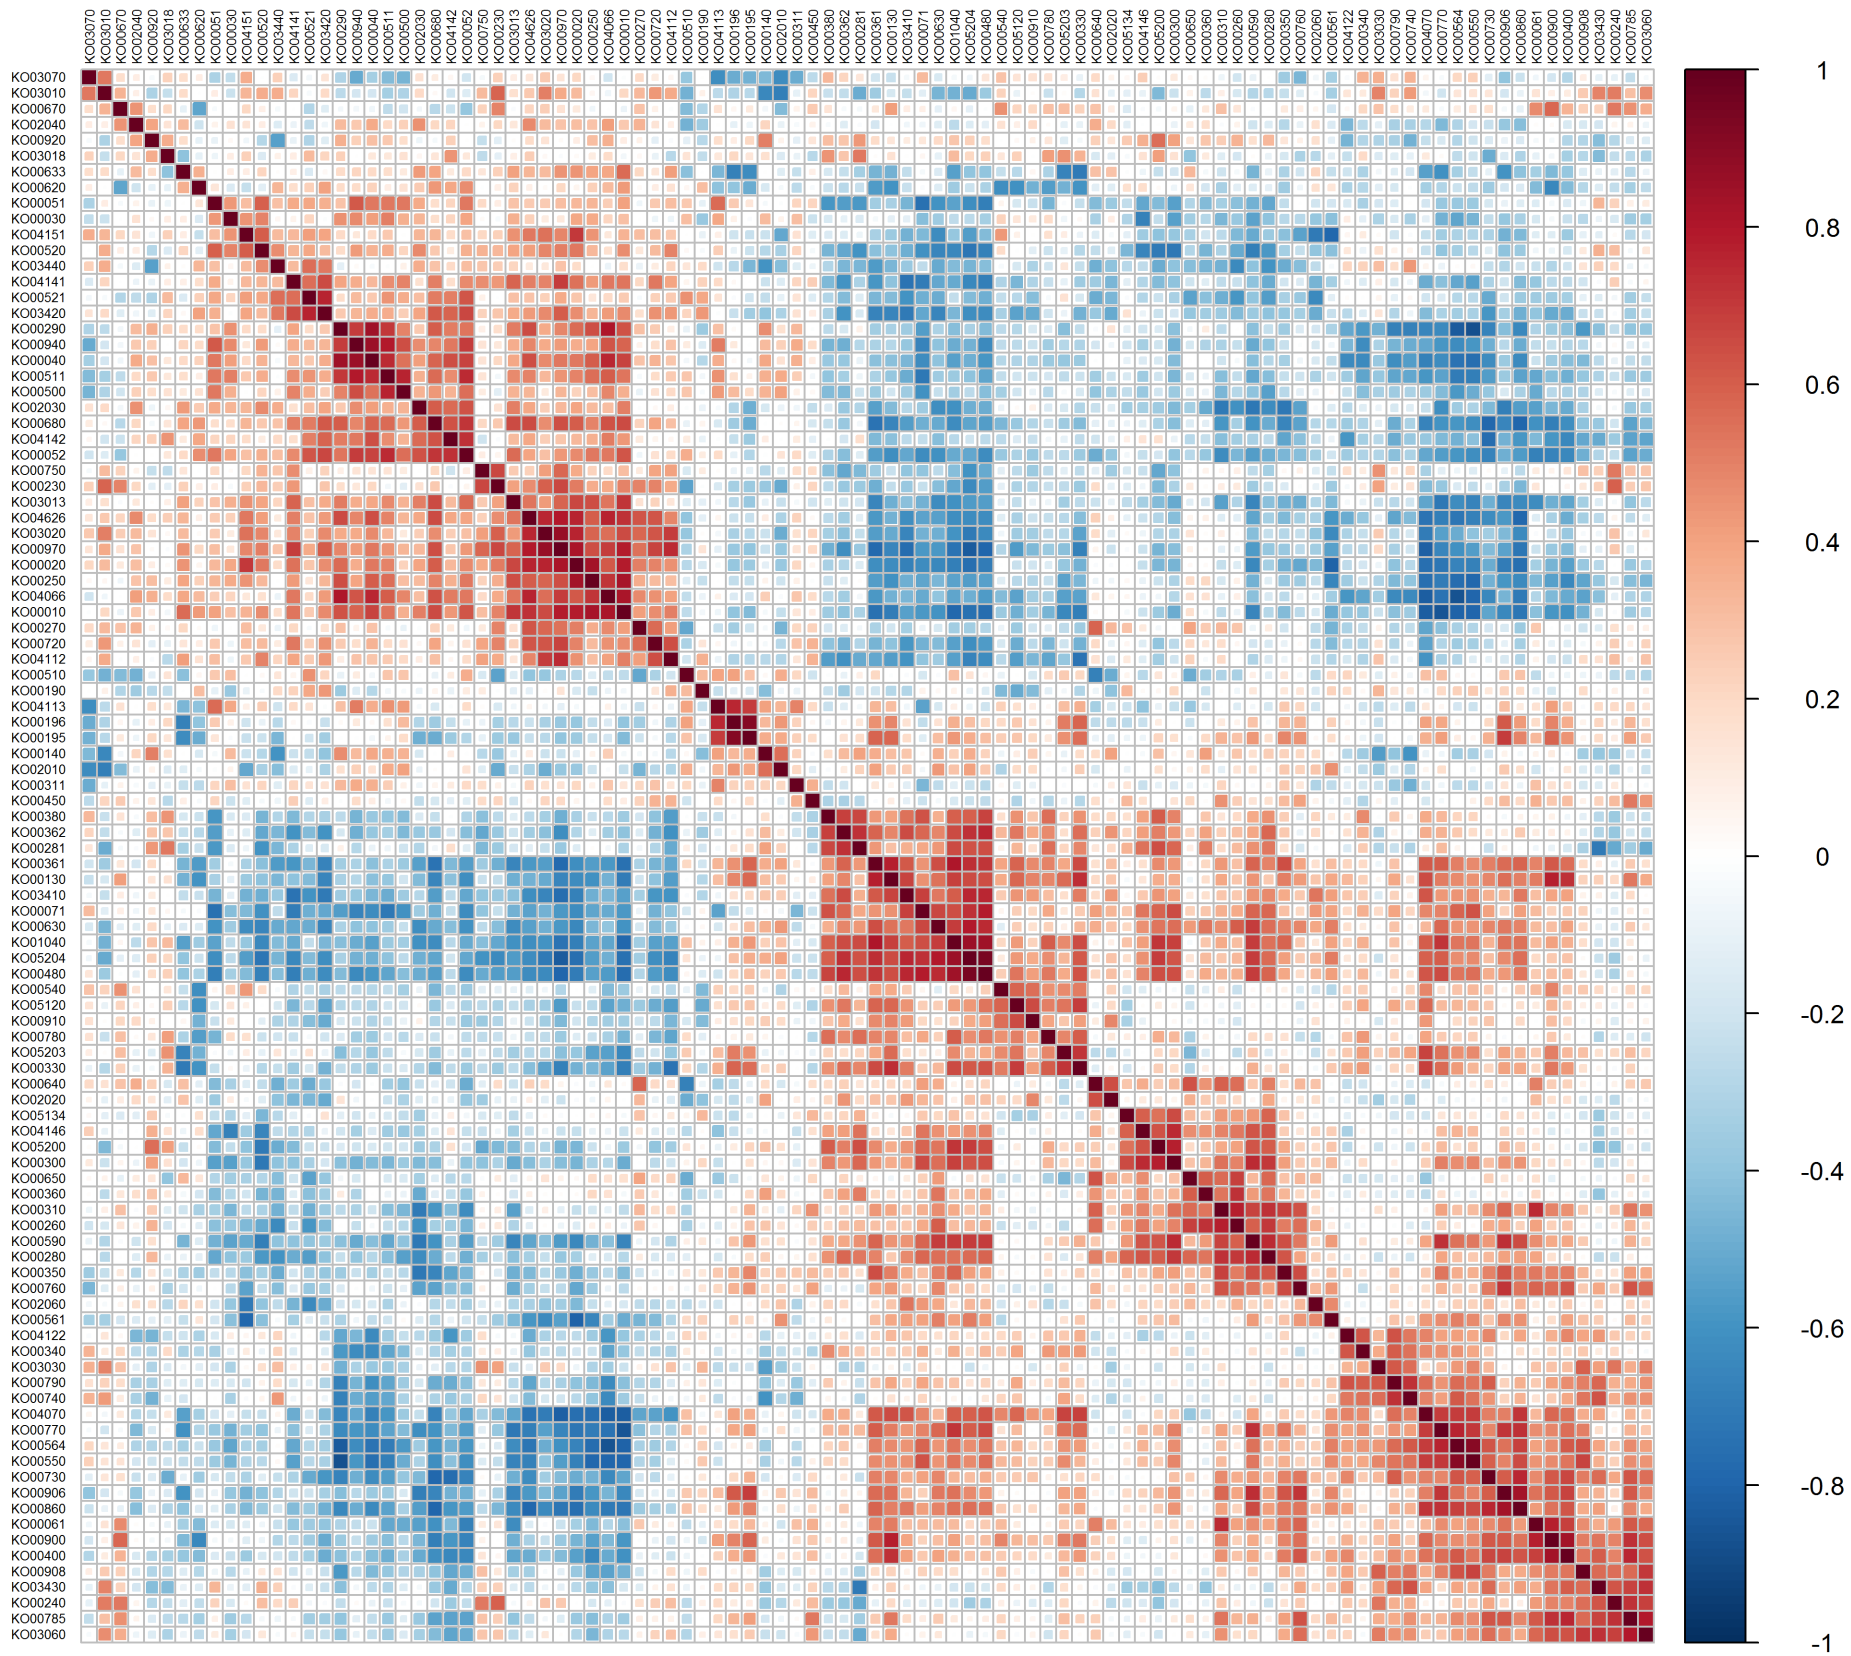

Supplement: Supplemental_Fig_3.pdf [file Supplemental_Fig_3.pdf]
